# Supplementary material for: Reveal the Antimigraine Mechanism of Chuanxiong Rhizoma and Cyperi Rhizoma Based on the Integrated Analysis of Metabolomics and Network Pharmacology
Source: PubMed Central journal article supplement (PMC8987590; doi:10.3389/fphar.2022.805984), 2022-03-24
Supplement: Table1.pdf [file Table1.pdf]

**Table S1.** 77 potential target genes obtained from the compound-reaction-enzyme-gene network.

| Gene Symbol |         |       |       |      |        |        |       |        |        |        |
|-------------|---------|-------|-------|------|--------|--------|-------|--------|--------|--------|
| AASDHPPT    | ALDH3B1 | ASNS  | CRAT  | FPGS | GGT1   | GLS2   | GPT   | NAGS   | PSPH   | SPTLC2 |
| AGXT        | ALDH3B2 | ASS1  | DDAH1 | FTCD | GGT2   | GLUD1  | GPT2  | OPLAH  | SARS   | TAT    |
| AGXT2       | ALDH4A1 | AZIN2 | DDAH2 | GAD1 | GGT3   | GLUD2  | HPD   | OTC    | SARS2  | TDO2   |
| ALDH18A1    | ALDH8A1 | BAAT  | DDC   | GAD2 | GGTL3  | GLUDP5 | IL4I1 | PEPB   | SDS    | TPH1   |
| ALDH1A1     | AOC1    | BTD   | EARS2 | GATM | GGTL4  | GLUL   | MAOA  | PLD1   | SHMT1  | TPH2   |
| ALDH1A3     | AOC2    | CBS   | EPRS  | GCLC | GGTLA1 | GOT1   | MAOB  | PLD2   | SHMT2  | WARS   |
| ALDH3A1     | AOC3    | COMT  | FAAH2 | GCLM | GLS    | GOT2   | MIF   | PRKACA | SPTLC1 | WARS2  |
